# Supplementary material
Source: Springer Nature journal article supplement (https://www.springermedizin.de/resource/supplementary/12990_2007_99_MOESM2_ESM.pdf/9612564)

# Functional measures

## A. Brain areas functionally related to pain processing.

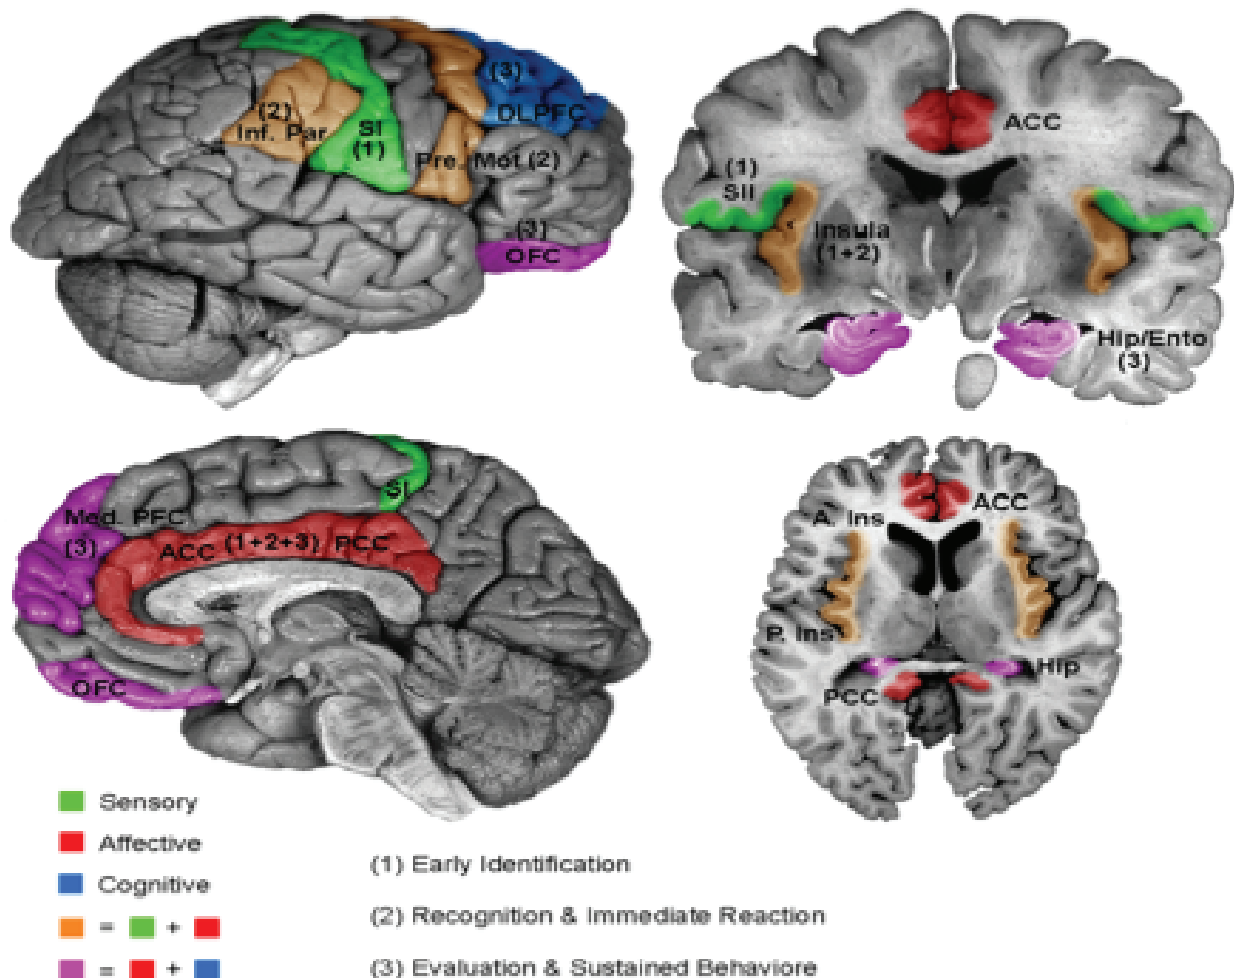

## B. Example of functional MRI response to painful stimulation.

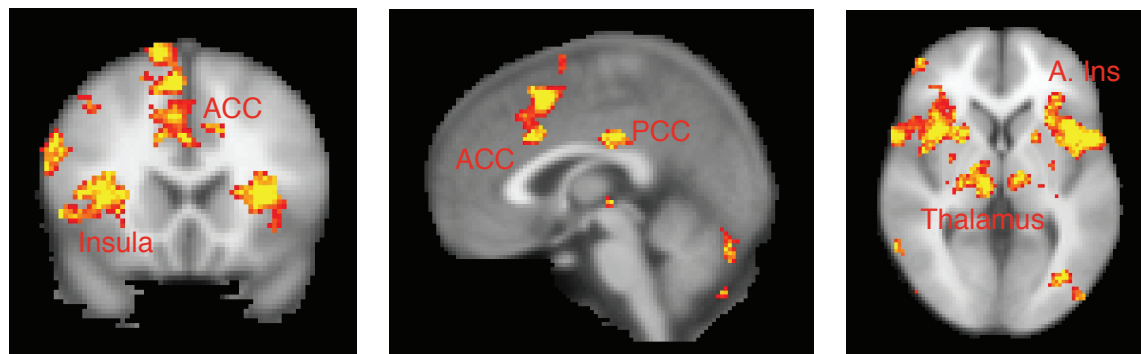

Supplement: MOESM2 [file 9612564]
